# Leveraging uncertainty information from deep neural networks for disease detection

Christian Leibig<sup>1,\*</sup>, Vaneeda Allken<sup>1</sup>, Philipp Berens<sup>1,2+</sup>, and Siegfried Wahl<sup>1,3+</sup>

<sup>1</sup>Institute for Ophthalmic Research, Eberhard Karls University, Tübingen, Germany

<sup>2</sup>Bernstein Center for Computational Neuroscience and Centre for Integrative Neuroscience, Eberhard Karls University, Tübingen, Germany

<sup>3</sup>Carl Zeiss Vision International GmbH, Germany

\*christian.leibig@uni-tuebingen.de

+Co-senior author

## ABSTRACT

Deep learning (DL) has revolutionized the field of computer vision and image processing. In medical imaging, algorithmic solutions based on DL have been shown to achieve high performance on tasks that previously required medical experts. However, DL-based solutions for disease detection have been proposed without methods to quantify and control their uncertainty in a decision. In contrast, a physician knows whether she is uncertain about a case and will consult more experienced colleagues if needed. Here we evaluate the uncertainty of DL in medical diagnostics based on a recent theoretical insight on the link between dropout networks and approximate Bayesian inference. Using the example of detecting diabetic retinopathy (DR) from fundus photographs, we show that uncertainty informed decision referral improves diagnostic performance. Experiments across different networks, tasks and datasets showed robust generalization. Depending on network capacity and task/dataset difficulty, we surpass 85% sensitivity and 80% specificity as recommended by the NHS when referring 0% – 20% of the most uncertain decisions for further inspection. We analyse causes of uncertainty by relating intuitions from 2D visualizations to the high-dimensional image space. While uncertainty is sensitive to clinically relevant cases, sensitivity to unfamiliar data samples is task dependent, but can be rendered more robust.

## Introduction

In recent years, deep neural networks (DNNs)<sup>1</sup> have revolutionized computer vision<sup>2</sup> and gained considerable traction in challenging scientific data analysis problems<sup>3</sup>. By stacking layers of linear convolutions with appropriate non-linearities<sup>4</sup>, abstract concepts can be learnt from high-dimensional input alleviating the challenging and time-consuming task of hand-crafting algorithms. Such DNNs are quickly entering the field of medical imaging and diagnosis<sup>5–15</sup>, outperforming state-of-the-art methods at disease detection or allowing one to tackle problems that had previously been out of reach. Applied at scale, such systems could considerably alleviate the workload of physicians by detecting patients at risk from a prescreening examination.

Surprisingly, however, DNN-based solutions for medical applications have so far been suggested without any risk-management. Yet, information about the reliability of automated decisions is a key requirement for them to be integrated into diagnostic systems in the healthcare sector<sup>16</sup>. No matter whether data is short or abundant, difficult diagnostic cases are unavoidable. Therefore, DNNs should report - in addition to the decision - an associated estimate of uncertainty<sup>17</sup>, in particular since some images may be more difficult to analyse and classify than others, both for the clinician and the model, and the transition from "healthy" to "diseased" is not always clear-cut.

Automated systems are typically evaluated by their diagnostic sensitivity, specificity or area under receiver-operating-characteristic (ROC) curve, metrics which measure the overall performance on the test set. However, as a prediction outcome can decide whether a person should be sent for treatment, it is critical to know how confident a model is about each prediction. If we were to know which patients are difficult to diagnose, humans and machines could attend especially to these, potentially increasing the overall performance. In fact, if the machine was making most mistakes when uncertain about a case, one could devise a strategy mimicking typical medical decision making. When faced with a difficult case and feeling uncertain about a decision a junior doctor will consult a more experienced colleague. Likewise, a diagnostic algorithm could flag uncertain cases as requiring particular attention by medical experts.

Estimating the uncertainty about a machine learning based prediction on a single sample requires a distribution over possible outcomes, for which a Bayesian perspective is principled. Bayesian approaches to uncertainty estimation have indeed been

proposed to assess the reliability of clinical predictions<sup>19–22</sup> but have not been applied to the large-scale real-world problems that DNNs can target. Outside the medical domain, the integration of the Bayesian ideas and DNNs is an active topic of research<sup>23–34</sup>, but the practical value of the developed methods has yet to be demonstrated.

Due to its ease of use and inherent scalability, a recent insight from Gal & Ghahramani<sup>31,32,35</sup> is particularly promising for use in medical settings. Using dropout networks<sup>36,37</sup>, where subsets of units are inactivated during training to avoid overfitting, one can compute an approximation to the posterior distribution by sampling multiple predictions with dropout turned on. This allows one to perform approximate but efficient Bayesian inference by using existing software implementations in a straightforward way. Another advantage of this approach is that it can be applied to already trained networks.

Here we assess whether this allows us to retrieve informative uncertainty estimates for a large-scale, real world disease detection problem. Diabetic retinopathy (DR) is one of the leading causes of blindness in the working-age population of the developed world<sup>38</sup>. If the symptoms are detected in time, progress to vision impairment can be averted but the existing infrastructure is insufficient and manual detection is time-consuming. With the increase in the global incidence of diabetes<sup>39</sup>, clinicians now recognize the need for a cost-effective, accurate and easily performed automated detection of DR to aid the screening process<sup>14,38,40–42</sup>. Previous recommendations of the British Diabetic Association (now Diabetes UK) are often cited as 80% sensitivity and 95% specificity [41, 43, 44, and references therein] but the current minimum thresholds set by the NHS Diabetes Eye Screening programme are 85% sensitivity and 80% specificity for sight-threatening diabetic retinopathy<sup>16</sup>.

Using a Bayesian DNN, we achieve state-of-the-art results for diabetic retinopathy detection on the publicly available dataset Messidor<sup>45</sup>. The computed measure of uncertainty allowed us to refer a subset of difficult cases for further inspection, resulting in substantial improvements in detection performance in the remaining data. This finding generalized across different model architectures, detection tasks and datasets. In practice, patients whose samples result in uncertain decisions would either be sent for further screening tests or referred directly to a specialist. We further explore the causes of uncertainty in our scenario. Intuitions illustrated on a 2D toy problem are used to understand how uncertainty might behave in the high-dimensional image space. This allowed us to predict the kind of application relevant scenarios for which the assessed uncertainty is informative.

## Results

Here we tackle two major questions: first, we evaluate whether model uncertainty obtained from dropout networks at test time is useful for ranking test data by their prediction performance without knowing the latter. In the second part, we open the black box in order to learn what renders predictions uncertain.

### Predicting diabetic retinopathy with a measure of (un)certainty

#### Diabetic retinopathy datasets

We used a DNN-based approach to detect diabetic retinopathy (DR) from fundus images. Our main dataset used for training is taken from a previous Kaggle competition<sup>46</sup>. This dataset consists of 35,126 training images and 53,576 test images, graded into five stages of DR by clinicians according to the following scale<sup>47</sup>: 0 - No DR, 1 - Mild, 2 - Moderate, 3 - Severe and 4 - Proliferative DR. The percentage of images labelled with No DR is about 73% in both the training and test dataset.

In order to measure the true generalization of our insights we in addition applied all networks to the publicly available Messidor dataset<sup>45</sup>. This dataset comprises 1,200 images divided into the following categories: 0 - No DR, 1 - Mild non-proliferative, 2 - Severe non-proliferative, 3 - Most serious DR.

#### Disease detection tasks

Because the question of whether a patient has to be sent to a physician at all, is of high priority, we reduced the problem to a binary classification task. Therefore we split the data into a "healthy" versus "diseased" set by grouping some of the classes. In order to analyse how model uncertainty behaves for different tasks, we varied the disease onset level. If set to 1, the classes except for 0 are in the "diseased" category resulting in a detector for mild DR (or more severe) whereas for disease onset level 2, classes {0, 1} are considered "healthy" and moderate DR (or more severe levels) are in the "diseased" group.

#### Network architectures

We used two different network architectures for our experiments: (1) Two networks trained for the questions at hand. (2) The publicly available network architecture and weights<sup>48</sup> provided by the participant who ranked 5th out of 661 teams in the Kaggle DR competition<sup>46</sup>, which we will call *JFnet*.

The *JFnet* comprises 13 convolutional layers, 3 fully connected layers and a concatenation layer combining information from the contralateral eyes of a patient. Convolutional layers are interleaved with 5 max pooling layers, fully connected layers are interleaved with two feature pooling and dropout ( $p_{drop} = 0.5$ ) layers each. All non-linearities are ReLUs<sup>49</sup> or Leaky ReLUs<sup>50</sup> (leakiness 0.5) except for the softmax output layer<sup>51</sup>. We recast the original model's five output units (trained for Kaggle DR's level discrimination task) to our binary tasks by summing the output of respective units.

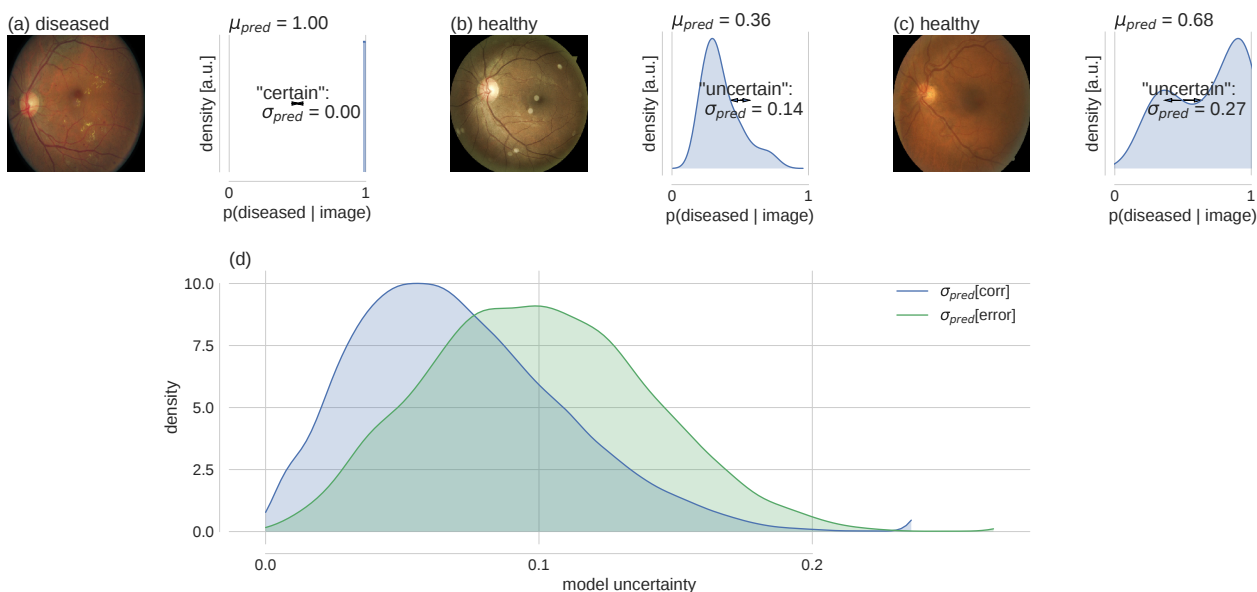

**Figure 1. Bayesian model uncertainty for diabetic retinopathy detection. (a)-(c), left:** Exemplary fundus images with human label assignments in the titles. **(a)-(c), right:** Corresponding approximate predictive posteriors (Eq. 6) over the softmax output values  $p(\text{diseased}|\text{image})$  (Eq. 1). Predictions are based on  $\mu_{pred}$  (Eq. 7) and uncertainty is quantified by  $\sigma_{pred}$  (Eq. 8). Examples are ordered by increasing uncertainty from left to right. **(d)** Distribution of uncertainty values for all Kaggle DR test images, grouped by correct and erroneous predictions. Label assignment for "diseased" was based on thresholding  $\mu_{pred}$  at 0.5. Given a prediction is incorrect, there is a strong likelihood that the prediction uncertainty is also high.

86 Our own network architecture was inspired by the monocular part of the JFnet (which in turn is VGG-like<sup>52</sup>), with the fully  
 87 connected part replaced by the concatenation of a global mean and a global max pooling layer, followed by a softmax output  
 88 layer. In contrast to the JFnet, our networks do not rely on both images of a given patient being present, i.e. they do not perform  
 89 eye blending. Furthermore, they have more network parameters that are treated in a Bayesian manner<sup>32</sup>, because we added  
 90 dropout ( $p_{drop} = 0.2$ ) after each convolutional layer for which reason we denote these networks as *Bayesian* convolutional  
 91 neural networks (BCNNs).

### 92 Bayesian model uncertainty

93 We measured the uncertainty associated with the predictions of the DNNs described above, exploiting a relationship between  
 94 dropout networks and a Bayesian posterior<sup>31</sup>. Typically, the softmax output of a classification network denotes a single  
 95 prediction given a sample. In case of DR detection from a fundus image (see fig. 1a left, for a "diseased" example) a trained  
 96 network would output the probability that the given image is "diseased" (fig. 1a, right). The softmax probability is based  
 97 on a single set of network parameters, whereas in a Bayesian setting one aims for the predictive posterior (compare eq. 2),  
 98 i.e. a distribution over predictions (in our case the softmax values) obtained by integrating over the distribution over possible  
 99 parameters.

100 The predictive posterior of a neural network is hard to obtain. However, Gal and colleagues<sup>31</sup> showed that by leaving  
 101 dropout turned on at test time, we can draw Monte Carlo samples from the approximate predictive posterior (for details see  
 102 Methods). We will summarize each predictive posterior distribution by its first two moments. The predictive mean  $\mu_{pred}$  (eq. 7)  
 103 will be used for predictions and the predictive standard deviation  $\sigma_{pred}$  (eq. 8) as the associated uncertainty.

104 Based on a fundus image, a DNN can be certain (1a) or more or less uncertain (1b-c) about its decision, as indicated by  
 105 the width of the predictive posterior distribution: For example, an image can be classified as certainly diseased, where all  
 106 sampled predictions are 1.0, such that  $\sigma_{pred} = 0$  (fig. 1a). A different example is classified as "healthy", but the network  
 107 predictions are more spread out ( $\sigma_{pred} = 0.14$ ) (fig. 1b). The predicted label is still correct, because  $\mu_{pred} = 0.36 < 0.5$ .  
 108 Finally, some examples produce high uncertainty in the DNN ( $\sigma_{pred} = 0.27$ ) and result in an erroneous "diseased" prediction  
 109 ( $\mu_{pred} = 0.68 > 0.5$ ) (fig. 1c).

110 If high model uncertainty was indicative of erroneous predictions, this information could be leveraged to increase the

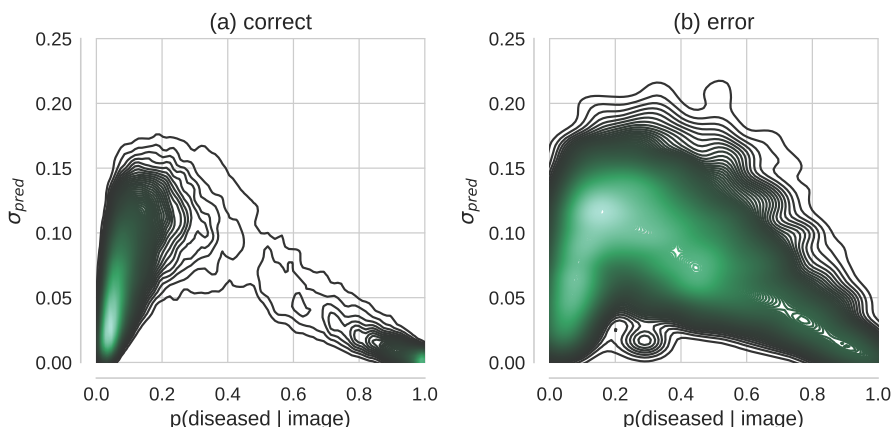

**Figure 2. Relation between Bayesian model uncertainty  $\sigma_{pred}$  and maximum-likelihood, i.e. conventional softmax probabilities  $p(diseased|image)$ .** Each subplot shows the 2-dimensional density over Kaggle DR test set predictions conditioned on: correctly (a) vs. erroneously (b) classified images respectively.

111 performance of the automated system by selecting appropriate subsets for referral for further inspection. Indeed, model  
112 uncertainty was higher for incorrect predictions (fig. 1d). This means that  $\sigma_{pred}$  (a quantity that can be evaluated at test time)  
113 can be used to rank order prediction performance (a quantity unknown at test time), in order to mimic the human clinical work  
114 flow. In face of uncertain decisions, further information should be obtained.

115 Importantly, model uncertainty as quantified by  $\sigma_{pred}$  adds complementary information to the conventional network output  
116 as quantified by  $p(diseased|image)$  (eq. 1), i.e. with dropout turned off at test time. Specific softmax values do not determine  
117 the precise values that  $\sigma_{pred}$  assumes (fig. 2). This decouples prediction uncertainty as measured by  $p(diseased|image)$  from  
118 model uncertainty. Lower probabilities that an image is diseased are associated with a larger range of uncertainties while high  
119 probabilities that an image is diseased are confined to smaller uncertainties, indicating that if an image can be classified as  
120 diseased, this typically happens with confidence. In contrast, healthy is a much less crisp concept, where variation among  
121 individuals can lead to significant uncertainty in judgement.

## 122 **Uncertainty rank orders prediction performance**

### 123 **Performance improvement via uncertainty-informed decision referral**

124 To test whether we could exploit the uncertainty measurement proposed above to mimic the clinical workflow and refer patients  
125 with uncertain diagnosis for further testing, we performed predictions (using the BCNN trained for disease onset I on the  
126 Kaggle DR training images) for all Kaggle DR test images and sorted the predictions by their associated uncertainty. We then  
127 referred predictions based on various levels of tolerated uncertainty for further diagnosis and measured the accuracy of the  
128 predictions (threshold at 0.5) for the remaining cases (fig. 3a).

129 We observed a monotonic increase in prediction accuracy for decreasing levels of tolerated model uncertainty, which  
130 translates to the same behaviour when monitoring the fraction of retained data instead (fig. 3b, blue curve). As a control  
131 experiment, we compared with randomly selected predictions, that is without using uncertainty information (fig. 3b, green  
132 curve). For less than 2% decisions referred for further inspections, the 95% confidence intervals of the two scenarios are already  
133 non-overlapping. Uncertainty is hence informative about prediction performance, here measured by accuracy.

### 134 **Performance improvement for different costs, networks, tasks and datasets**

135 Here we build on the idea of uncertainty informed decision referral introduced above (fig. 3) and assess whether performance  
136 improvements are robust across different settings. So far (fig. 1-3), predictions had been converted to labels by thresholding the  
137 network output at 0.5. In a medical setting however, different costs are associated with false positive and false negative errors.  
138 These can be controlled by the decision threshold at which the diseased probability given an image is converted to the category  
139 "diseased". A complete picture can be obtained by the decision system's receiver-operating-characteristic, which monitors  
140 *sensitivity* over *1 - specificity* pairs for all conceivable decision thresholds. The quality of such a ROC curve can be summarized  
141 by its area under the curve (AUC), which varies between 0.5 (chance level) and 1.0 (best possible value). Importantly, ROC  
142 characteristics allow to assess model uncertainty independent of prediction uncertainty.

143

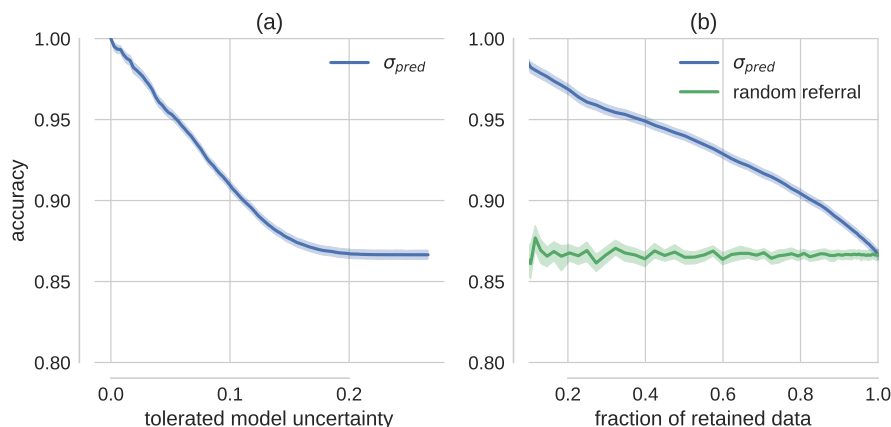

**Figure 3. Improvement in accuracy via uncertainty-informed decision referral.** (a) The prediction accuracy as a function of the tolerated amount of model uncertainty. (b) Accuracy is plotted as a fraction of retained data. The green curve shows the effect of rejecting the same number of samples randomly, that is without taking into account information about uncertainty.

144 ROC AUC improves monotonically with decreasing levels of tolerated uncertainty (fig. 4a, left). In addition, ROC curves for  
145 all Kaggle test images as well as under 10, 20 and 30% decision referral reveal that both sensitivity and specificity consistently  
146 improved (fig. 4a, right). These results were found to be robust for a variety of settings, that is for our different networks/tasks  
147 (disease onset 1 (fig. 4, left double column) vs. disease onset 2 (fig. 4, right double column)) as well as when applied to the  
148 completely independent Messidor database (fig. 4, 2nd row). For comparison with a different network architecture we refer to  
149 figure (S1) in the appendix.

150 The application to Messidor provides a report of the true generalization performance, because it had never been used for  
151 either of our networks. Our networks are thus robust against the distributional shift between Kaggle and Messidor which will  
152 be analysed later (fig. 8) in more detail.

153 Even though our primary aim was not to achieve high performance, we surpassed the requirements of both the NHS  
154 and the British Diabetic Association (Fig. 4) for (automated) patient referral for several settings and perform on par with  
155 the non-ensembling approach of Antal & Hajdu<sup>43</sup>. We also performed similar ensembling<sup>18,43</sup>, by selecting an optimal  
156 (forward-backward search while monitoring AUC) ensemble of 100 networks from a much larger pool of dropout networks by  
157 controlling the random seeds. Performance improvements however were marginal and did not generalize to test data (data not  
158 shown), probably because this compromises the stochastic nature of the regularizing effects of dropout. For a summary of the  
159 different configurations and comparison with the state-of-the-art we refer to table 1.

160 The better performance for moderate DR detection (onset 2) as compared to mild DR detection (onset 1) across networks  
161 and datasets is in line with the more pronounced expression of symptoms as the disease progresses. Comparison across datasets  
162 reveals that for both tasks, the models performed better on Messidor than on Kaggle data (compare fig. 4a vs. c and b vs. d).  
163 Specifically, we achieved both the BDA and NHS requirements on Messidor without having to refer decisions whereas for  
164 Kaggle data we have to refer 0 – 30% of the data, depending on the recommendation, task difficulty and network capacity. It  
165 has been reported previously that about 10%<sup>53</sup> of the Kaggle DR images were considered ungradable according to national UK  
166 standards. We want to emphasize that the proposed uncertainty informed decision referral did not rely on labels for such cases,  
167 that is we could detect performance impeding images without training a separate, supervised detection algorithm. To what  
168 extent images associated with low model confidence relate to clinically relevant cases or ungradable images will be analysed in  
169 the next section.

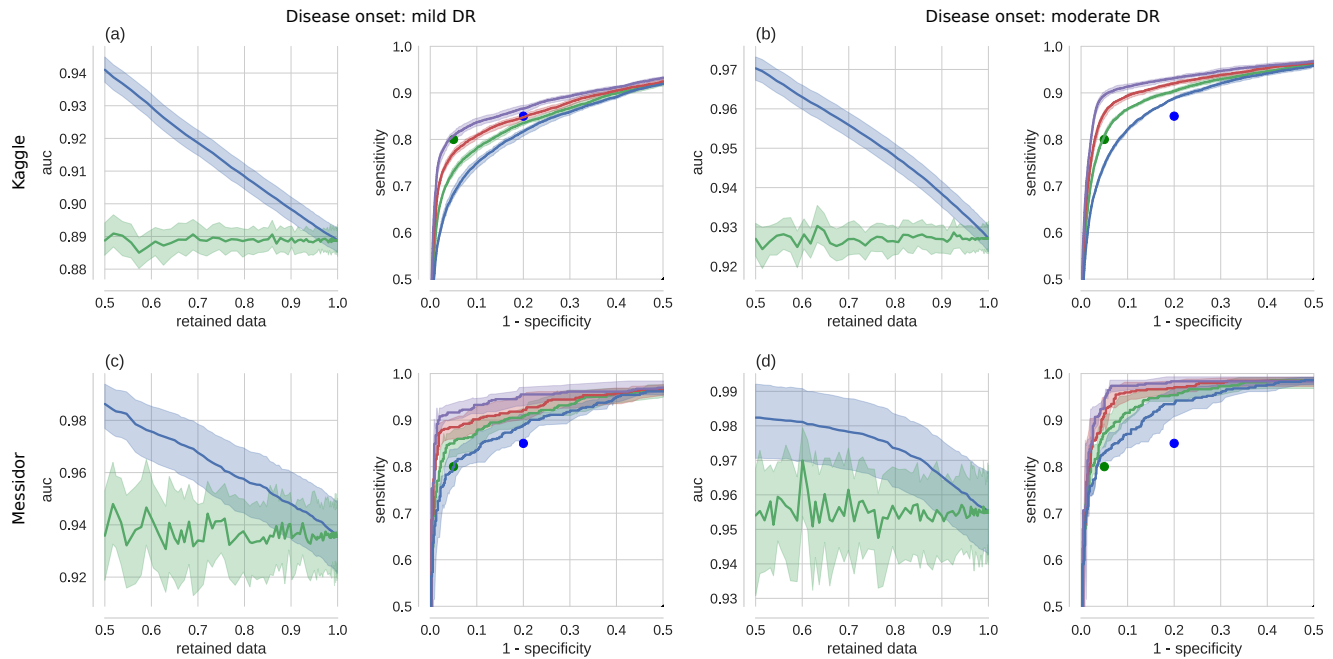

**Figure 4. Improvement in receiver-operating-characteristics via uncertainty-informed decision referral for different networks/tasks (left vs. right double column), and datasets (1st vs. 2nd row). Disease detection performance under decision referral improves independent of the threshold used for converting  $p(\text{diseased}|\text{image})$  into a diagnosis. (a, left)** ROC AUC over the fraction of retained data under uncertainty informed (blue) and random (green) decision referral for a Bayesian CNN, trained for disease onset 1 and tested on Kaggle DR. **(a, right)** ROC curves for all data (no referral: blue) and different fractions of retained data (90%: green, 80%: red, 70%: purple). Panels (b)-(d) have the same layout. National UK standards for the detection of sight-threatening diabetic retinopathy (in<sup>54</sup> defined as moderate DR) from the BDA (80%/95% sensitivity/specificity, dark green dot) and the NHS (85%/80% sensitivity/specificity, bright green dot) are given in all subpanels with ROC curves. **(b)** same as (a), but for disease onset 2. **(c)** Same network/task as in (a), but tested on Messidor. **(d)** Same network/task as in (b), but tested on Messidor.

| Dataset     | Architecture              | Task                   | 100% data<br>AUC                  | 90% data<br>AUC            | 80% data<br>AUC            | 70% data<br>AUC            |
|-------------|---------------------------|------------------------|-----------------------------------|----------------------------|----------------------------|----------------------------|
| Kaggle DR   | Bayes. CNN                | (0) vs (1,2,3,4)       | 0.889<br>CI: [0.885-0.892]        | 0.898<br>CI: [0.894-0.902] | 0.908<br>CI: [0.904-0.912] | 0.918<br>CI: [0.914-0.922] |
| Kaggle DR   | Bayes. CNN                | (0, 1) vs (2,3,4)      | 0.927<br>CI: [0.924-0.930]        | 0.938<br>CI: [0.935-0.941] | 0.947<br>CI: [0.944-0.950] | 0.956<br>CI: [0.953-0.959] |
| Messidor    | Bayes. CNN                | (0) vs (1,2,3)         | 0.936<br>CI: [0.922-0.949]        | 0.948<br>CI: [0.935-0.960] | 0.956<br>CI: [0.943-0.968] | 0.968<br>CI: [0.956-0.978] |
| Messidor    | Bayes. CNN                | (0, 1) vs (2,3)        | 0.955<br>CI: [0.943-0.967]        | 0.965<br>CI: [0.953-0.975] | 0.973<br>CI: [0.962-0.983] | 0.978<br>CI: [0.967-0.988] |
| Kaggle DR   | JFnet                     | (0) vs (1,2,3,4)       | 0.911<br>CI: [0.908-0.914]        | 0.918<br>CI: [0.914-0.921] | 0.925<br>CI: [0.921-0.929] | 0.932<br>CI: [0.928-0.935] |
| Kaggle DR   | JFnet                     | (0, 1) vs (2,3,4)      | 0.947<br>CI: [0.944-0.950]        | 0.953<br>CI: [0.949-0.956] | 0.954<br>CI: [0.951-0.958] | 0.956<br>CI: [0.952-0.960] |
| Messidor    | Single best <sup>43</sup> | (0) vs (1, 2, 3)       | 0.936                             | -                          | -                          | -                          |
| Messidor    | Ensemble <sup>43</sup>    | (0) vs (1, 2, 3)       | 0.989                             | -                          | -                          | -                          |
| Messidor-2* | CNN <sup>14</sup>         | (0, 1) vs ( $\geq 2$ ) | <b>0.990</b><br>CI: [0.986-0.995] | -                          | -                          | -                          |

**Table 1.** Model performance (measured by AUC) with two different datasets, architectures and tasks when data with higher uncertainty levels is referred to further inspection. \*For Messidor-2<sup>45,55</sup> no labels are publicly available for comparison with our networks.

## 170 What causes uncertainty?

171 Next we asked what causes the networks to consider the prediction about an image uncertain. In order to build an intuitive  
172 understanding of uncertainty estimates, we trained a simple Bayesian neural network (3 hidden layers with 100 units each) with  
173 dropout layers interleaved ( $p_{drop} = 0.5$ ) on a 2D toy classification problem (fig. 5).

174 The network learns the non-linear hyperplane (defined by  $p(y = 1 | \mathbf{x}, \theta) = 0.5$ ) that separates the two classes (fig. 5a) shown  
175 as the network’s softmax output when evaluated traditionally, that is with dropout turned off at test time. The first (fig. 5b,  
176 eq. 7) and second moment (fig. 5c, eq. 8) of the approximate predictive posterior (eq. 6) in turn are more spread out along  
177 directions orthogonal to the separating hyperplane given by the conventional softmax output. This is because the Bayesian  
178 perspective models a distribution over possible separating hyperplanes. In contrast to the conventional network output,  $\mu_{pred}$   
179 and  $\sigma_{pred}$  are more related. Incidentally, this was also true in the high-dimensional real world setting, where mean and the  
180 standard deviation of the predictive posterior resulted in similar uncertainty judgements (fig. S2). Note that regions in the input  
181 space that have high probabilities of belonging to either class in the non-Bayesian setting (fig. 5a) may still carry substantial  
182 uncertainties in the Bayesian setting (fig. 5c), which is in line with the high-dimensional case as illustrated by figure (2).

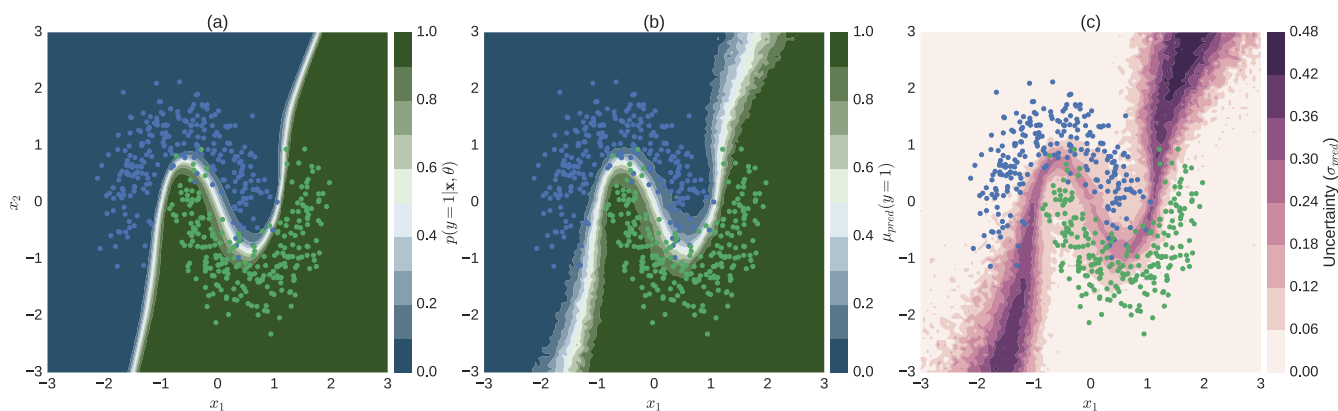

**Figure 5. Illustration of uncertainty for a 2D binary classification problem.** (a) Conventional softmax output obtained by turning off dropout at test time (eq. 1). (b) Predictive mean of approximate predictive posterior (eq. 7). (c) Uncertainty, measured by predictive standard deviation of approximate predictive posterior (eq. 8). The softmax output (a) is overly confident (only a narrow region in input space assumes values other than 0 or 1) when compared to the Bayesian approach (b, c). Uncertainty (c) tends to be high for regions in input space through which alternative separating hyperplanes could pass. Colour-coded dots in all subplots correspond to test data the network has not seen during training.

183 In order to evaluate the relationship of uncertainty with respect to the class boundary, we devised an experiment that makes  
184 use of the gradual progression of disease levels from 0 to 4 as provided by physicians in case of Kaggle DR data. We probed  
185 what happened to images with different ”distances” from the healthy/diseased boundary defined by the disease onset level of a

186 given task. To this end, we quantified the proportion of the different disease levels in the data referred for further inspection for  
 187 various levels of tolerated uncertainty (Fig. 6).

188 If no model uncertainty is tolerated, we observe the prior distribution (shown on the vertical axis at  $\sigma_{pred} = 0$ ) of disease  
 189 levels because all data is referred. If instead only the most uncertain cases are referred, the contribution of those disease  
 190 levels that are adjacent to the healthy/diseased boundary (black lines in fig. 6a & b) is increased. For mild DR defining the  
 191 disease onset and large tolerated uncertainties, disease levels 0 and 1 dominate the pool of referred data (fig. 6a). If we shifted  
 192 the disease onset to moderate DR, in an analogous manner disease levels 1 and 2 dominate the referred data sets for high  
 193 uncertainties (fig. 6b). In an intermediate regime however, such as e.g. around an uncertainty of 0.1 for which we still refer less  
 194 than 25% of the data, the relative contribution of disease levels is already resembling the prior. Taken together with the fact  
 195 that we improve performance throughout at least up to 50% data referral (compare fig. 3&4) it is not only those samples that  
 196 neighbour the class boundaries that carry meaningful uncertainties as determined by the networks.

197 As a side note, depending on the therapeutic possibilities - moderate DR detection (fig. 6a) might be preferable to mild DR  
 198 detection (fig. 6a) as the uncertainty still detected level 1 patients in the latter case but reduced the amount of healthy patients  
 199 sent for referral.

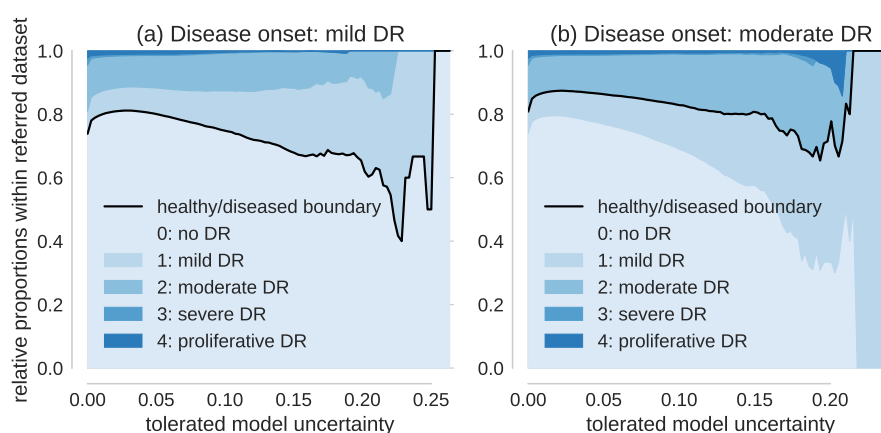

**Figure 6. Proportion of disease levels in referred datasets.** The value on the x-axis indicates the uncertainty of a sample to be tolerated for automatic diagnosis. All samples in the referral dataset have thus uncertainties of at least the value on the x-axis. The relative proportion of disease levels for tolerated uncertainty = 0 corresponds to the prior. **(a)** Disease onset level is mild DR (1). Disease levels 0 and 1 neighbour the healthy/diseased boundary (black) and dominate the referral dataset for high but not intermediate uncertainty. **(b)** Disease onset level is moderate DR (2). In analogy to (a), disease levels 1 and 2 neighbour the healthy/diseased boundary (black) and dominate the decision referral populations with high in contrast to intermediate uncertainties.

200 In the following we devised an experiment that aimed to evaluate the algorithm's referral decisions against physicians'  
 201 decisions. For that purpose we made use of the availability of both eyes' images for each patient in case of Kaggle DR data.  
 202 Even though therapeutic intervention is typically based on a patient level diagnosis, the contra-lateral eye of a given patient may  
 203 be in a different state and therefore carry a different label. A strong correlation of the two eyes' disease states was leveraged to  
 204 improve performance by many Kaggle competition participants<sup>46</sup>. However, even after compilation of the 5-class problem to  
 205 the binary disease detection problem, 5 – 10% of images categorized as diseased have images from the contra-lateral eye with a  
 206 disagreeing label.

207 Whether the corresponding patients are diseased or not is therefore undefined and they should be subject to referral. By  
 208 measuring the proportion of images whose contra-lateral ground truth label is different for the referred and retained data sets  
 209 respectively (fig. 7), we could analyse to what extent the model uncertainty reflects a physician's uncertainty. Exemplarily  
 210 (fig. 7a), if the tolerated model uncertainty were 0.2, only  $\approx 8\%$  of the retained images ( $\sigma_{pred} \leq 0.2$ ) belong to a patient  
 211 with ambiguous disease state whereas nearly 20% of the referred images ( $\sigma_{pred} > 0.2$ ) belong to a patient with ambiguous  
 212 disease state. Throughout, images from patients with one healthy and one diseased eye are more likely to be referred for further  
 213 inspection than retained (fig. 7). For both disease detection tasks (fig. 7 a/b for mild/moderate DR as disease onset respectively)  
 214 this is particularly pronounced in the regime of high uncertainty.



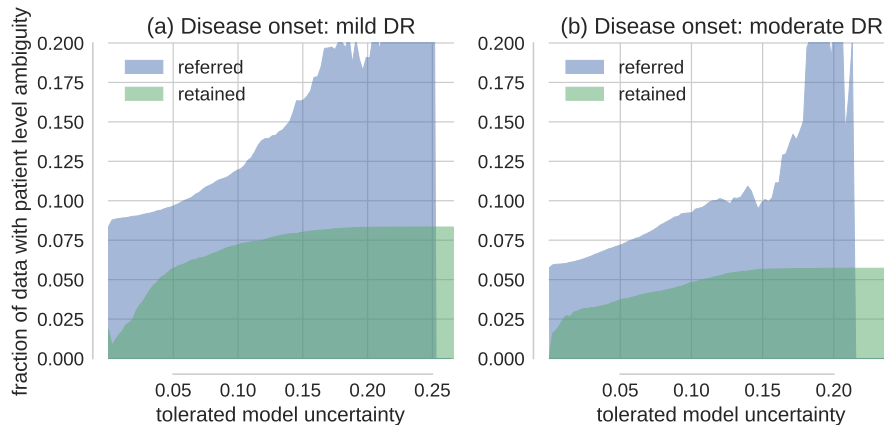

**Figure 7. Decision referral of images from ambiguous patients. (a)** Disease onset is mild DR (1). **(b)** Disease onset is moderate DR (2). Both subplots show the relative proportion of images from ambiguous patients in the referred (blue) and retained (green) data buckets for various tolerated uncertainty values. Patient level ambiguity is defined by images whose contra-lateral eye (from the same patient) carries a different label. Note that the decision referral of images is based on the uncertainty from a single image. Ground truth labels and the contra-lateral eye information are only used as meta information for evaluation purposes. Especially in the high uncertainty regime, images from ambiguous patients are more likely to be referred for further inspection than accepted for automatic decision. This is in line with how a physician would decide because ambiguous patients have an undefined disease state and should be subject to further examination.

## 215 Uncertainty about unfamiliar data samples

216 Ideally, model uncertainty about the predicted class would be high for data not trained to recognize or even be sensitive to  
217 adversarial attacks<sup>56</sup>. In this case, one could use uncertainty not only to determine which images are hard to diagnose and  
218 require further inspection, but also to sort out unusable data. Unfortunately, uncertainty about a discriminative model (family)  
219 is not necessarily suited to detect samples "far" from the training data. In two dimensions (compare fig. 5c) it is easy to see that  
220 regions that are both far away from the data and carry high model uncertainty are not isotropically distributed with regard to the  
221 data but rather task dependent. With increasing dimensionality of the input space, more separating hyperplanes are conceivable  
222 to solve a given task, attributing non-zero uncertainties to a larger fraction of the input space. Nevertheless, the task dependency  
223 is built into the model. In the following we show for the high-dimensional scenario that the task and dataset difficulty influence  
224 the separability of unfamiliar data samples from the distribution the network was trained for.

225 In order to test this in our scenario we performed predictions with associated uncertainties on the 2012 Imagenet validation  
226 set (49101 coloured, non-fundus images from 1000 different categories)<sup>57</sup> using our networks trained on fundus images (Fig. 8  
227 a,b). Interestingly, Messidor images have the lowest average uncertainty, followed by Kaggle and Imagenet samples, especially  
228 for disease onset 2. Interestingly, the networks perform much better on the Messidor dataset than on the Kaggle dataset, and  
229 disease detection for onset 2 is much easier than for onset 1, indicating that in relatively easy tasks/datasets uncertainty does to  
230 some extent serve to detect out-of-sample images. If the distinction between "healthy" and "diseased" was clear cut such as in  
231 the case of many classes used for classical computer vision tasks, it is well conceivable that the uncertainty distributions would  
232 be well separated for the known and unknown classes<sup>18</sup>. Because we observe substantial uncertainty about the presence of DR,  
233 the detection of unfamiliar data samples is however obscured, at least for the Kaggle dataset.

234 If the task is to detect samples far from the training distribution, an alternative to using the model uncertainty from the task  
235 dependent, discriminative setting (fig. 8 a,b) is to model the training data distribution in order to detect outliers. For comparison  
236 we therefore performed anomaly detection by autoencoding the 512-dimensional feature vectors of the penultimate layer of a  
237 disease detection network. The deep autoencoder (DAE) comprised two fully-connected (FC) encoding layers with 128 and 32  
238 units, followed by two FC decoding layers with 128 and 512 units respectively. We quantified the distance of data samples from  
239 the (Kaggle) training data distribution by measuring the reconstruction error between a penultimate layer feature vector and  
240 its autoencoder based reconstruction (fig. 8c/d: disease onset 1/2). Here, Imagenet samples clearly show a higher anomaly  
241 score such that their presence could be detected based on the features learned by our network. The distribution of Messidor and  
242 Kaggle images seems similar, with Messidor images having slightly higher anomaly scores, being indicative of the fact that  
243 Kaggle and Messidor datasets have slightly different statistics.

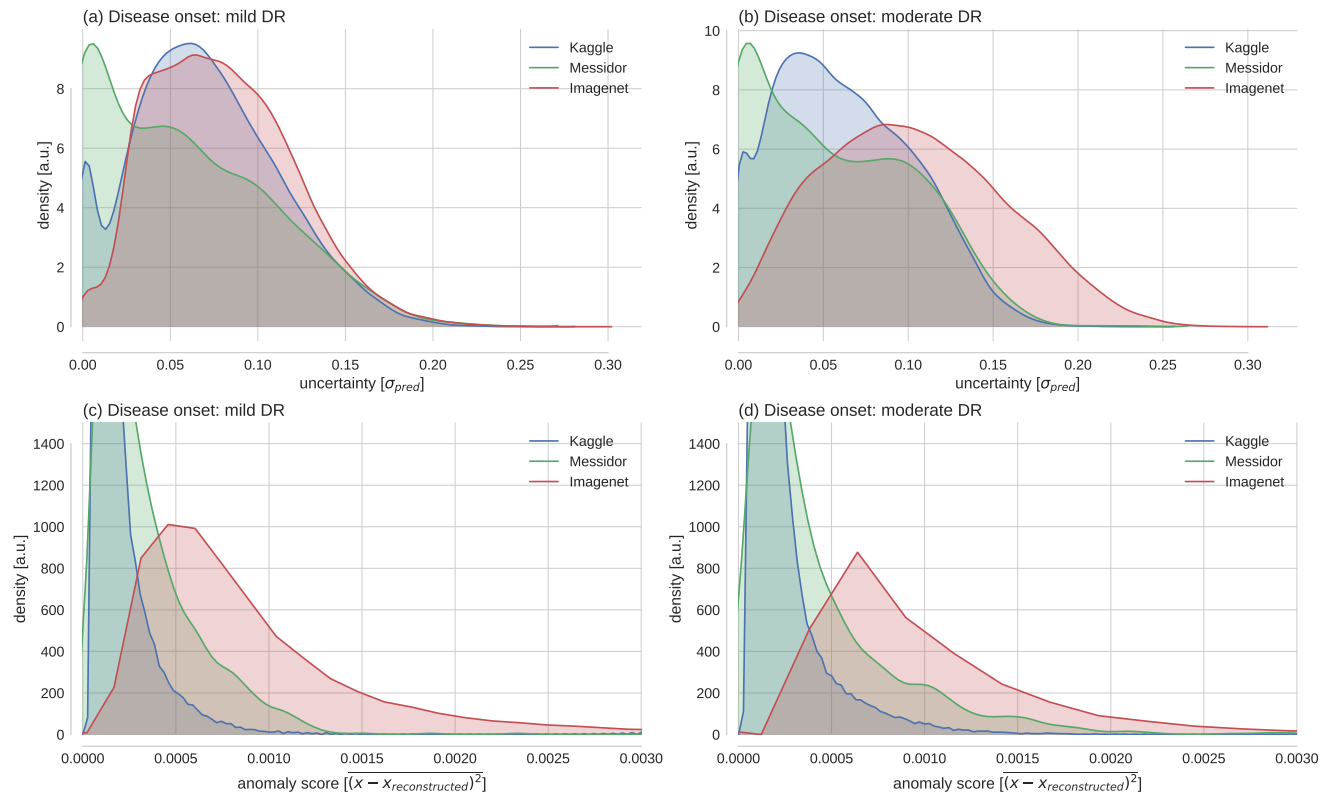

**Figure 8. Uncertainty in face of (un)familiar data samples.** (a) Empirical distributions of model uncertainty ( $\sigma_{pred}$ ) for familiar data with known semantic content (Kaggle) and unfamiliar data with known semantics (Messidor) vs. unknown semantics (Imagenet). (b) Same as in (a) but for the task of detecting moderate (2) instead of mild DR (1). (c) & (d) Reconstruction errors of a deep autoencoder trained on the penultimate layer features of the Kaggle training set. All distributions shown in a-d for Kaggle refer to the test set.

## 244 Discussion

245 Here we showed that it is feasible to associate deep learning based predictions about the presence of DR in fundus photographs  
246 with uncertainty measures that are informative and interpretable. Using the recently identified connection between dropout  
247 networks and approximate Bayesian inference<sup>31,32</sup>, we computed meaningful uncertainty measures without needing additional  
248 labels for an explicit *uncertain* category. Computing this uncertainty measure was efficient, as computing the approximate  
249 predictive posterior for one image took about  $\approx 200ms$ .

250 While not being crucially necessary for the purpose of evaluating model uncertainty, the performance achieved by our  
251 networks met the requirements for UK national standards for automatically diagnosing DR under several settings (table 1,  
252 fig. 4). For all settings we could improve performance in terms of ROC AUC (fig. 4,S1) by referring uncertain (fig. 5, 6, 7)  
253 cases for further inspection. Acquiring further opinions naturally integrates into the traditional clinical work flow as well as  
254 into a human-machine loop in which especially attended, difficult cases could be fed back into the model for its continuous  
255 improvement<sup>58</sup>.

256 We observed slightly worse performance on Kaggle data as compared to Messidor. We want to point out, that the quality of  
257 the former dataset was questioned previously - albeit informally, both by competition participants<sup>46</sup> as well as by clinicians<sup>53</sup>.  
258 The extent to which the set of images considered uncertain by our approach overlaps with the images considered ungradable or  
259 wrongly labelled by humans is, however, unclear. Because images considered ungradable by clinical specialists may coincide  
260 with difficult diagnostic cases, these should be identifiable via high uncertainties from our approach. Easy decisions for images  
261 with wrong labels in turn should cause wrong predictions with low uncertainty. Both situations could hence be identified by our  
262 approach and be used to selectively reduce label noise and improve model performance.

263 The scope of which scenarios the assessed uncertainty is able to deal with can be understood by our results regarding the  
264 causes of uncertainty. We showed that model uncertainty was sensitive to clinically relevant cases, that is patients with an  
265 undefined disease state as determined by physicians (fig. 7). Aiming for a qualitative understanding, we showed that it is  
266 in particular difficult decisions that are considered uncertain by the networks, both for the 2D toy examples (fig. 5) as well  
267 as for the high-dimensional image case (fig. 6 & 7). The main difference of a Bayesian approach with respect to the plain  
268 softmax output is the fact that multiple separating hyperplanes instead of just a single one are taken into account. This renders  
269 the model uncertainty to extend beyond regions around the prediction uncertainty of the conventional network output (fig.  
270 5a vs. c). Because we observed monotonic performance improvements under decision referral (fig. 4) and a composition of  
271 disease levels resembling the prior for intermediate uncertainties (fig. 6), a much higher fraction of the input space is associated  
272 with uncertainty (see as well fig. 8a,b) than the 2D scenario might suggest (fig. 5c). Recent research on uncertainty  
273 measures<sup>18,34</sup> is actually relying on this in order to detect unknown classes or adversarial attacks. The task dependency of  
274 discriminative model uncertainty together with high uncertainty due to diffuse class boundaries may however obscure the  
275 detectability of unfamiliar data samples (fig. 8a,b). Out-of-sample image detection was however feasible to some extent by  
276 modelling the data distribution in the penultimate layer's feature space (fig. 8c,d).

277 We conclude that this work successfully demonstrated the benefits, applicability and limitations of uncertainty in deep  
278 learning<sup>59</sup> for disease detection. This paradigm can readily be applied to recently published high performance disease detection  
279 networks<sup>14,15</sup> as well as other medical tasks and datasets as initial work on image registration<sup>60</sup> and genome data<sup>61</sup> has already  
280 shown. We also believe that segmentation<sup>30</sup> and regression<sup>62</sup> problems which are omnipresent in biomedical imaging and  
281 diagnostics could largely benefit from taking uncertainty into account.

## 282 Methods

### 283 General DNN methodology

#### 284 *Software and code availability*

285 We used the deep learning framework Theano<sup>63</sup>(0.9.0dev1.dev-RELEASE) together with the libraries Lasagne<sup>64</sup>(0.2.dev1) and  
286 Keras<sup>65</sup>(1.0.7). Network trainings and predictions were performed using a NVIDIA GeForce GTX 970 and a GeForce GTX  
287 1080 with cuda versions 7.5/8 and cuDNN 4/5. All code and models for fast DR detection under uncertainty will be publicly  
288 available upon publication at <https://bitbucket.org/cleibig/disease-detection>.

#### 289 *Image preprocessing*

290 All images were cropped to a squared centre region and resized to 512x512 pixels. In order to compensate for the decreased  
291 network depth in case of the Bayesian CNNs we additionally subtracted the local average colour for contrast enhancement  
292 purposes as described<sup>66</sup> and used<sup>13</sup> previously. Images fed to the JFnet were normalized the same way as had been used for  
293 training by the author<sup>48</sup>, whereas those fed to the BCNNs were standard normalized for each colour channel separately.

## 294 **Network training**

We trained one Bayesian CNN for each disease detection task using 80% of the Kaggle DR training data. We minimized the cross-entropy plus regularization terms (Eq. 5) using stochastic gradient descent with a batch size of 32 and Nesterov updates (momentum=0.9). All parameters were initialized with the weights from the JFnet. Final weights were chosen based on the best ROC AUC achieved on a separate validation set (20% of Kaggle DR training data) within 30 training epochs. The learning rate schedule was piecewise constant (epoch 1-10: 0.005, epoch 11-20: 0.001, epoch 21-25: 0.0005, epoch 26-30: 0.0001). L2-regularization ( $\lambda = 0.001$ ) was applied to all parameters, L1-regularization ( $\lambda = 0.001$ ) to only the last layer in the network. Data augmentation was applied to 50% of the data in an epoch. Affine transformations were composed by drawing uniformly from ranges for zooming ( $\pm 10\%$ ), translating (independent shifts in x- and y-directions by  $\pm 25$  pixels), and rotating ( $\pm \pi$ ). Transformed images were in addition flipped along the vertical and/or the horizontal axis if indicated by respective draws from a Binomial distribution ( $\mu = 0.5$ ). Effects of class imbalance onto the stochastic gradient were compensated by attributing more weight to the minority class, given by the relative class frequencies in each mini-batch<sup>67</sup>  $p(k)_{mini-batch}$ . To achieve this, we reweighted the cross-entropy part of the cost function (compare eq. 5) for a mini-batch of size  $n$  to:

$$-\frac{1}{Kn} \sum_{i=1}^n \frac{\log \frac{e^{f(\mathbf{x}_i, \theta)(\hat{\omega}_i)_k}}{\sum_j e^{f(\mathbf{x}_i, \theta)(\hat{\omega}_i)_j}}}{p(k)_{mini-batch}}$$

295 We fixed the amount of dropout for the convolutional layers to  $p_{drop} = 0.2$ , because this was a good compromise between getting  
 296 a reasonable performance and uncertainty measures. We observed convergence problems for larger  $p_{drop}$  when initializing the  
 297 Bayesian CNNs with the pretrained weights from the network without dropout between conv. layers. Gradually increasing  
 298 dropout during training could potentially ease convergence. Alternatively, the dropout rates could be learnt via *variational*  
 299 *dropout*<sup>28</sup>.

## 300 **Approximate Bayesian model uncertainty for deep learning**

301 Recently, it was shown<sup>31</sup> that a multi-layer-perceptron (i.e. a stack of densely connected layers) with dropout after every weight  
 302 layer is mathematically equivalent to approximate variational inference<sup>51</sup> in the deep Gaussian process (GP) model<sup>68,69</sup>. This  
 303 result holds for any number of layers and arbitrary non-linearities. Next, this idea was extended to incorporate convolutional  
 304 layers<sup>32</sup>, potentially loosing the GP interpretation, but preserving the possibility to obtain an approximation to the predictive  
 305 posterior in a Bayesian sense. Here, we summarize the core idea for deep classification networks and highlight in particular the  
 306 difference between the Bayesian perspective and the classification confidence obtained from the softmax output.

### 307 **Softmax vs. Bayesian uncertainty**

308 DNNs (with or without convolutional layers) for classifying a set of  $N$  observations  $\{\mathbf{x}_1, \dots, \mathbf{x}_i, \dots, \mathbf{x}_N\}$  into a set of associated  
 309 class memberships  $\{y_1, \dots, y_i, \dots, y_N\}$  with  $y_i \in \{1, \dots, K\}$ , and  $K$  the number of classes, can be trained by minimizing the  
 310 cross-entropy between the distribution of the true class labels and the softmax network output:

$$p(y_i = k | \mathbf{x}_i, \theta) = \frac{e^{f(\mathbf{x}_i, \theta)_k}}{\sum_j e^{f(\mathbf{x}_i, \theta)_j}} \quad (1)$$

311 Equation (1) denotes the probability that the observation  $\mathbf{x}_i$  belongs to class  $k$ , if propagated through the network function  $f$   
 312 with all parameters summarized by  $\theta$ , i.e. weights  $\mathbf{W}_i$  and biases  $\mathbf{b}_i$  of all layers  $i \in \{1, \dots, L\}$ . For the example of disease  
 313 detection from images, we have a single unit whose output denotes the probability for the presence of the disease in a given  
 314 image.

315 Cross-entropy minimization results in a single best parameter vector  $\theta$ , constituting the maximum-likelihood solution. L2-  
 316 regularization, typically used to prevent overfitting, is equivalent to putting a Gaussian prior on the network parameters, resulting  
 317 in a maximum-a-posteriori (MAP) solution.

318 A fully probabilistic treatment in a Bayesian sense, however, would consider a distribution over network parameters instead of  
 319 a point estimate. By integrating over the posterior  $p(\theta | \mathbf{X}, \mathbf{y}, \mathbf{x}^*)$  given the entire training data  $\{\mathbf{X}, \mathbf{y}\}$  and a new test sample  $\mathbf{x}^*$   
 320 one would like to obtain the predictive posterior distribution over class membership probabilities:

$$p(y^* | \mathbf{X}, \mathbf{y}, \mathbf{x}^*) = \int p(y^* | \theta, \mathbf{x}^*) p(\theta | \mathbf{X}, \mathbf{y}) d\theta \quad (2)$$

321 Whereas equation (1) determined a single value specifying the probability that an image belongs to the *diseased* class, the  
 322 predictive posterior (Eq. 2) defines a distribution of such predictions, that is the probability values that a single image is  
 323 *diseased*. Intuitively, the width of the predictive posterior should reflect the reliability of the predictions. For large training data

sets, the parameter point estimates (from maximum-likelihood or MAP) may correspond to the mean or mode of the predictive posterior, resulting in a potentially strong relationship between the width of the predictive posterior and the softmax output, however this is not guaranteed. Indeed we've found that only for the original JFnet the softmax output may be used as a proxy for (prediction instead of model) uncertainty (values close to 0.5 were considered uncertain, data not shown), whereas the Bayesian treatment worked for all investigated scenarios.

### Bayesian convolutional neural networks with Bernoulli approximate variational inference

In practice, equation (2) is intractable and a common way to find approximating solutions is via *variational inference*. We assume the true posterior to be expressible in terms of a finite set of random variables  $\omega$ . The posterior is then approximated by the *variational distribution*  $q(\omega)$  as follows:

$$p(\theta|\mathbf{X}, \mathbf{y}, \mathbf{x}^*) \approx \int p(\theta|\mathbf{x}^*, \omega)p(\omega|\mathbf{X}, \mathbf{y})d\omega \approx \int p(\theta|\mathbf{x}^*, \omega)q(\omega)d\omega \quad (3)$$

Maximizing the *log evidence lower bound* with respect to the approximating distribution  $q(\omega)$ :

$$\mathcal{L}_{VI} := \int p(\mathbf{y}|\mathbf{X}, \omega)q(\omega)d\omega - KL(q(\omega)||p(\omega)) \quad (4)$$

has two effects. The first term maximizes the likelihood of the training data  $\{\mathbf{X}, \mathbf{y}\}$ , whereas the second term takes care of approximating the true distribution  $p(\omega)$  by  $q(\omega)$ . The key insight from Gal & Ghahramani was then to link equation (4) with dropout training. Here, we will summarize the derivations<sup>35</sup> in words. The integral in eq. (4) is still intractable and therefore approximated with Monte Carlo sampling. This results in the conventional softmax loss for dropout networks, for which units are dropped by drawing from a Bernoulli prior with probability  $p_{dropout}$  for setting a unit to zero. The KL term in (4) was shown<sup>35</sup> to correspond to a L2-regularization term in dropout networks. Summing up, approximate variational inference with a Bernoulli approximating distribution can be performed with the following loss:

$$\mathcal{L}_{VI} := \mathcal{L}_{dropout} = - \sum_{i=1}^N \log \frac{e^{f(\mathbf{x}_i, \theta(\hat{\omega}_i)_k)}}{\sum_j e^{f(\mathbf{x}_i, \theta(\hat{\omega}_i)_j)}} + \lambda \sum_{i=1}^L \|\theta_i(\hat{\omega}_i)\|^2 \quad \hat{\omega}_i \sim q(\omega) \quad (5)$$

We use  $\hat{\omega}_i$  as a shorthand notation for stating that in order to decide whether a unit is dropped, we independently sample from a Bernoulli distribution (with probability  $p_{dropout}$ ) for each unit in all layers for each training sample. Note that Monte Carlo sampling from  $q(\omega)$  is equivalent to performing dropout during training, hence we get the Bayesian network perspective as well for already trained models.

### Obtaining model uncertainty at test time

Obtaining model uncertainty for a given image is as simple as keeping the dropout mechanism switched on at test time and performing multiple predictions. The width of the distribution of predictions is then a reasonable proxy for the model uncertainty. More formally expressed, we replace the posterior with the approximating distribution (Eq. 3) and plug it into the expression for the predictive posterior (2):

$$p(y^*|\mathbf{X}, \mathbf{y}, \mathbf{x}^*) \approx \int p(y^*|\mathbf{x}^*, \omega)q(\omega)d\omega \quad (6)$$

We then approximate the integral by Monte Carlo sampling and compute the predictive mean (to be used for a final prediction on a test image):

$$\mu_{pred} \approx \frac{1}{T} \sum_{t=1}^T p(y^*|\mathbf{x}^*, \theta(\hat{\omega}_t)) \quad (7)$$

as well as the predictive standard deviation as a proxy for the uncertainty associated with this prediction:

$$\sigma_{pred} \approx \frac{1}{T-1} \sqrt{\sum_{t=1}^T (p(y^*|\mathbf{x}^*, \theta(\hat{\omega}_t)) - \mu_{pred})^2} \quad (8)$$

For this work, we fixed  $T = 100$  because it was shown by<sup>32</sup> to suffice. The test predictions could be performed in parallel, but even a serial implementation takes less than 200ms per image.

### Analysis of results

All density plots are based on Gaussian kernel density estimates, for which the bandwidth was chosen based on Scott's method<sup>70</sup>. All line plots are based on the entire data and the 95% confidence intervals were obtained from  $10^4$  bootstrap samples.

## References

- 358 **1.** Schmidhuber, J. Deep Learning in Neural Networks: An Overview. *Neural Networks* **61**, 85–117 (2015).
- 359 **2.** Krizhevsky, A., Sutskever, I. & Hinton, G. E. ImageNet Classification with Deep Convolutional Neural Networks. *Advances*  
360 *in Neural Information Processing Systems* 1–9 (2012).
- 361 **3.** Rusk, N. Deep learning. *Nature Methods* **13**, 35–35 (2016).
- 362 **4.** LeCun, Y., Bengio, Y. & Hinton, G. Deep learning. *Nature* **521**, 436–444 (2015).
- 363 **5.** Ciresan, D. C., Giusti, A., Gambardella, L. M. & Schmidhuber, J. Mitosis detection in breast cancer histology images with  
364 deep neural networks. *Lecture Notes in Computer Science* **8150**, 411–418 (2013).
- 365 **6.** Greenspan, H., van Ginneken, B. & Summers, R. M. Guest editorial deep learning in medical imaging: Overview and  
366 future promise of an exciting new technique. *IEEE Transactions on Medical Imaging* **35**, 1153–1159 (2016).
- 367 **7.** Miotto, R., Li, L., Kidd, B. A. & Dudley, J. T. Deep Patient: An Unsupervised Representation to Predict the Future of  
368 Patients from the Electronic Health Records. *Scientific Reports* **6**, 26094 (2016).
- 369 **8.** Litjens, G. *et al.* Deep learning as a tool for increased accuracy and efficiency of histopathological diagnosis. *Scientific*  
370 *Reports* **6**, 26286 (2016).
- 371 **9.** Chen, C. L. *et al.* Deep Learning in Label-free Cell Classification. *Scientific Reports* **6**, 21471 (2016).
- 372 **10.** Lipton, Z. C., Kale, D. C., Elkan, C. & Wetzell, R. Learning to Diagnose with LSTM Recurrent Neural Networks.  
373 *International Conference on Learning Representations (ICLR)* (2016).
- 374 **11.** Lu, L. *et al.* Deep Convolutional Neural Networks for Computer-Aided Detection : CNN Architectures , Dataset  
375 Characteristics and Transfer Learning Deep Convolutional Neural Networks for Computer-Aided Detection : CNN  
376 Architectures , Dataset Characteristics and Transfer. *IEEE Transactions on Medical Imaging* **35**, 1285–1298 (2016).
- 377 **12.** Tajbakhsh, N. *et al.* Convolutional Neural Networks for Medical Image Analysis: Full Training or Fine Tuning? *IEEE*  
378 *Transactions on Medical Imaging* **35**, 1299–1312 (2016).
- 379 **13.** van Grinsven, M. J. J. P., van Ginneken, B., Hoyng, C. B., Theelen, T. & Sánchez, C. I. Fast convolutional neural network  
380 training using selective data sampling: Application to hemorrhage detection in color fundus images. *IEEE transactions on*  
381 *medical imaging* **35**, 1273–1284 (2016).
- 382 **14.** Gulshan, V. *et al.* Development and Validation of a Deep Learning Algorithm for Detection of Diabetic Retinopathy in  
383 Retinal Fundus Photographs. *JAMA* **304**, 649–656 (2016).
- 384 **15.** Esteva, A. *et al.* Dermatologist-level classification of skin cancer with deep neural networks. *Nature* **542**, 115–118 (2017).
- 385 **16.** Widdowson, D. T. S. The management of grading quality: good practice in the quality assurance of grading.  
386 Tech. Rep. (2016). URL [https://www.gov.uk/government/uploads/system/uploads/attachment\\_](https://www.gov.uk/government/uploads/system/uploads/attachment_data/file/512832/The_Management_of_Grading.pdf)  
387 [data/file/512832/The\\_Management\\_of\\_Grading.pdf](https://www.gov.uk/government/uploads/system/uploads/attachment_data/file/512832/The_Management_of_Grading.pdf).
- 388 **17.** Ghahramani, Z. Probabilistic machine learning and artificial intelligence. *Nature* **521**, 452–459 (2015).
- 389 **18.** Lakshminarayanan, B., Pritzel, A. & Blundell, C. Simple and Scalable Predictive Uncertainty Estimation using Deep  
390 Ensembles. *arXiv:1612.01474* (2016).
- 391 **19.** Kononenko, I. Inductive and Bayesian Learning in Medical Diagnosis. *Applied Artificial Intelligence* **7**, 317–337 (1993).
- 392 **20.** Kononenko, I. Machine learning for medical diagnosis: History, state of the art and perspective. *Artificial Intelligence in*  
393 *Medicine* **23**, 89–109 (2001).
- 394 **21.** Wang, S. & Summers, R. M. Machine learning and radiology. *Medical Image Analysis* **16**, 933–951 (2012).
- 395 **22.** Sajda, P. Machine learning for detection and diagnosis of disease. *Annual Review of Biomedical Engineering* **8**, 537–65  
396 (2006).
- 397 **23.** Tishby, N., Levin, E. & Solla, S. A. Consistent inference of probabilities in layered networks: predictions and generaliza-  
398 tions. *International joint Conference on Neural Networks* (1989).
- 399 **24.** MacKay, D. J. C. A Practical Bayesian Framework for Backpropagation Networks. *Neural Computation* (1992).
- 400 **25.** Hinton, G. E., Hinton, G. E., van Camp, D. & van Camp, D. Keeping the neural networks simple by minimizing the  
401 description length of the weights. *Proceedings of the sixth annual conference on Computational learning theory (COLT)*  
402 (1993).
- 403 **26.** Neal, R. M. Bayesian learning for neural networks. *Lecture notes in statistics* (1996).
- 404

- 405 **27.** Graves, A. Practical Variational Inference for Neural Networks. *Advances in Neural Information Processing Systems*  
406 (2011).
- 407 **28.** Kingma, D. P., Salimans, T. & Welling, M. Variational Dropout and the Local Reparameterization Trick. *Advances in*  
408 *Neural Information Processing Systems* (2015).
- 409 **29.** Blundell, C., Cornebise, J., Kavukcuoglu, K. & Wierstra, D. Weight Uncertainty in Neural Networks. *Proceedings of the*  
410 *32nd International Conference on Machine Learning* (2015).
- 411 **30.** Kendall, A., Badrinarayanan, V. & Cipolla, R. Bayesian SegNet: model uncertainty in deep convolutional encoder-decoder  
412 architectures for scene understanding. *arXiv:1511.02680* (2015).
- 413 **31.** Gal, Y. & Ghahramani, Z. Dropout as a Bayesian Approximation: Representing Model Uncertainty in Deep Learning.  
414 *arXiv: 1506.02142* (2015).
- 415 **32.** Gal, Y. & Ghahramani, Z. Bayesian Convolutional Neural Networks with Bernoulli Approximate Variational Inference.  
416 *arXiv: 1506.02158* (2015).
- 417 **33.** Louizos, C. & Welling, M. Structured and Efficient Variational Deep Learning with Matrix Gaussian Posteriors. *Proceedings*  
418 *of the 33rd International Conference on Machine Learning* (2016).
- 419 **34.** Li, Y. & Gal, Y. Dropout Inference in Bayesian Neural Networks with Alpha-divergences *arXiv: 1703.02914*(2017).
- 420 **35.** Gal, Y. & Ghahramani, Z. Dropout as a Bayesian Approximation: Appendix. *arXiv: 1506.02157* (2015).
- 421 **36.** Hinton, G. E., Srivastava, N., Krizhevsky, A., Sutskever, I. & Salakhutdinov, R. R. Improving neural networks by preventing  
422 co-adaptation of feature detectors. *arXiv: 1207.0580* (2012).
- 423 **37.** Srivastava, N., Hinton, G. E., Krizhevsky, A., Sutskever, I. & Salakhutdinov, R. Dropout : A Simple Way to Prevent Neural  
424 Networks from Overfitting. *Journal of Machine Learning Research (JMLR)* **15**, 1929–1958 (2014).
- 425 **38.** Zaki, W. M. D. W. *et al.* Diabetic retinopathy assessment: Towards an automated system. *Biomedical Signal Processing*  
426 *and Control* **24**, 72–82 (2016).
- 427 **39.** World Health Organization. Global Report on Diabetes. (2016).
- 428 **40.** Mane, V. M. & Jadhav, D. V. Progress towards automated early stage detection of diabetic retinopathy: Image analysis  
429 systems and potential. *Journal of Medical and Biological Engineering* **34**, 520–527 (2014).
- 430 **41.** Kapetanakis, V. V. *et al.* A study of whether automated Diabetic Retinopathy Image Assessment could replace manual  
431 grading steps in the English National Screening Programme. *Journal of medical screening* **22**, 112–118 (2015).
- 432 **42.** De Fauw, J. *et al.* Automated analysis of retinal imaging using machine learning techniques for computer vision.  
433 *F1000Research* **5**, 1573 (2016).
- 434 **43.** Antal, B. & Hajdu, A. An ensemble-based system for automatic screening of diabetic retinopathy. *Knowledge-Based*  
435 *Systems* **60**, 20–27 (2014).
- 436 **44.** Sundling, V., Gulbrandsen, P. & Straand, J. Sensitivity and specificity of Norwegian optometrists' evaluation of diabetic  
437 retinopathy in single-field retinal images - a cross-sectional experimental study. *BMC health services research* **13**, 17  
438 (2013).
- 439 **45.** Decencière, E. *et al.* Feedback on a publicly distributed database: the Messidor database. *Image Analysis & Stereology* **33**,  
440 231–234 (2014).
- 441 **46.** Kaggle competition on Diabetic Retinopathy Detection (2015). URL [https://www.kaggle.com/c/  
442 diabetic-retinopathy-detection](https://www.kaggle.com/c/diabetic-retinopathy-detection).
- 443 **47.** Wu, L., Fernandez-Loaiza, P., Sauma, J., Hernandez-Bogantes, E. & Masis, M. Classification of diabetic retinopathy and  
444 diabetic macular edema. *World journal of diabetes* **4**, 290–4 (2013).
- 445 **48.** De Fauw, J. 5th place solution of the Kaggle Diabetic Retinopathy competition (2015). URL [https://github.com/  
446 JeffreyDF/kaggle\\_diabetic\\_retinopathy](https://github.com/JeffreyDF/kaggle_diabetic_retinopathy).
- 447 **49.** Nair, V. & Hinton, G. E. Rectified Linear Units Improve Restricted Boltzmann Machines. *Proceedings of the 27th*  
448 *International Conference on Machine Learning* 807–814 (2010).
- 449 **50.** Maas, A. L., Hannun, A. Y. & Ng, A. Y. Rectifier nonlinearities improve neural network acoustic models. In *Proceedings*  
450 *of the 30th International Conference on Machine Learning* (2013).
- 451 **51.** Bishop, C. M. *Pattern Recognition and Machine Learning*, Springer-Verlag New York, Inc., Secaucus, NJ, USA, (2006).

- 452 **52.** Simonyan, K. & Zisserman, A. Very Deep Convolutional Networks for Large-Scale Image Recognition. *International*  
453 *Conference on Learning Representations (ICLR)* (2015).
- 454 **53.** Pratt, H., Coenen, F., Broadbent, D. M., Harding, S. P. & Zheng, Y. Convolutional Neural Networks for Diabetic  
455 Retinopathy. *Procedia Computer Science* **90**, 200–205 (2016).
- 456 **54.** Younis, N., Broadbent, D. M., Harding, S. P. & Vora, J. P. Incidence of sight-threatening retinopathy in Type 1 diabetes in  
457 a systematic screening programme. *Diabetic medicine : a journal of the British Diabetic Association* **20**, 758–765 (2003).
- 458 **55.** Quéllec, G. *et al.* Optimal wavelet transform for the detection of microaneurysms in retina photographs. *IEEE Transactions*  
459 *on Medical Imaging* **27**, 1230–1241 (2008).
- 460 **56.** Goodfellow, I. J., Shlens, J. & Szegedy, C. Explaining and Harnessing Adversarial Examples. *International Conference on*  
461 *Learning Representations (ICLR)* (2015).
- 462 **57.** Russakovsky, O. *et al.* ImageNet Large Scale Visual Recognition Challenge. *International Journal of Computer Vision*  
463 **115**, 211–252 (2015).
- 464 **58.** Settles, B. Active Learning Literature Survey. *Machine Learning* **15**, 201–221 (2010).
- 465 **59.** Gal, Y. *Uncertainty in Deep Learning*. Ph.D. thesis, University of Cambridge (2016).
- 466 **60.** Yang, X., Kwitt, R. & Niethammer, M. Fast Predictive Image Registration. *International Workshop on Large-Scale*  
467 *Annotation of Biomedical Data and Expert Label Synthesis*, 48–57 (Springer, 2016).
- 468 **61.** Angermueller, C. & Stegle, O. Multi-task deep neural network to predict CpG methylation profiles from low-coverage  
469 sequencing data. *NIPS MLCB workshop* (2015).
- 470 **62.** Kendall, A. & Cipolla, R. Modelling Uncertainty in Deep Learning for Camera Relocalization. *arXiv:1509.05909v2*  
471 (2016).
- 472 **63.** Al-Rfou, R. *et al.* Theano: A Python framework for fast computation of mathematical expressions. *arXiv:1605.02688*  
473 (2016).
- 474 **64.** Dieleman, S. *et al.* Lasagne 0.2.dev. URL <https://github.com/Lasagne/Lasagne> (2016).
- 475 **65.** Chollet, F. & Others. Keras 1.0.7. URL <https://github.com/fchollet/keras> (2016).
- 476 **66.** Graham, B. Kaggle Diabetic Retinopathy Detection competition report. Tech. Rep., University of Warwick (2015).
- 477 **67.** Dalrymple, A., Shanahan, P. M., Kelly, J. & London, I. C. Tackling Class Imbalance with Deep Convolutional Neural Networks  
478 (2014).
- 479 **68.** Williams, C. K. I. Computing with infinite networks. *Advances in neural information processing systems* 295–301 (1997).
- 480 **69.** Damianou, A. C. & Lawrence, N. D. Deep Gaussian Processes. *International Conference on Artificial Intelligence and*  
481 *Statistics* **31**, 207–215 (2013).
- 482 **70.** Scott, D. W. On optimal and data-based histograms. *Biometrika* **66**, 605–610 (1979).

## 483 **Acknowledgements**

484 This work was funded by the German excellence initiative through the Institutional Strategy of the University of Tübingen and  
485 the Center for Integrative Neuroscience (EXC 307), the Bernstein Award for Computational Neuroscience by German Ministry  
486 for Education and Research (BMBF; FKZ: 01GQ1601) to PB. Additional support came from the early career program of the  
487 Medical Faculty of the University of Tübingen.

## 488 **Author contributions statement**

489 C.L., P.B. and S.W. designed the concept of the study. C.L. conducted the study. C.L., V.A. and P.B. wrote the manuscript. All  
490 authors reviewed the manuscript.

## 491 **Additional information**

492 **Competing financial interests:** The authors declare no competing financial interests.



493 **Supplementary**

494 **Performance improvement under decision referral for an already trained network**

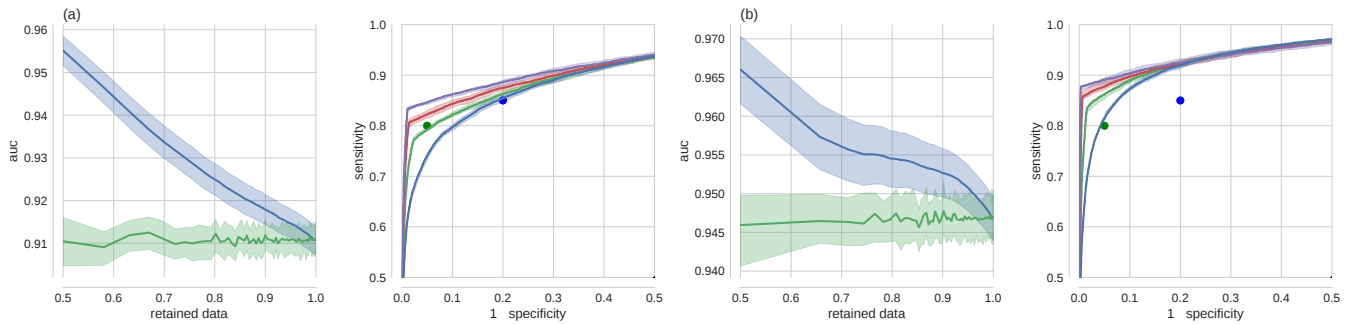

**Figure S1. Application of uncertainty-informed decision referral to an existing network (a, left) ROC AUC over the fraction of retained data under uncertainty informed (blue) and random (green) decision referral for the JFnet, recast to detect disease onset 1. (a, right) ROC curves for all data (no referral: blue) and different fractions of retained data (90%: green, 80%: red, 70%: purple). National UK standards for the detection of sight-threatening diabetic retinopathy (in<sup>54</sup> defined as moderate DR) from the BDA (80%/95% sensitivity/specificity, dark green dot) and the NHS (85%/80% sensitivity/specificity, bright green dot) are given in all subpanels with ROC curves. (b) same as (a), but for disease onset 2. All subfigures are based on Kaggle DR test images.**

495 **Relation between  $\mu_{pred}$  and  $\sigma_{pred}$**

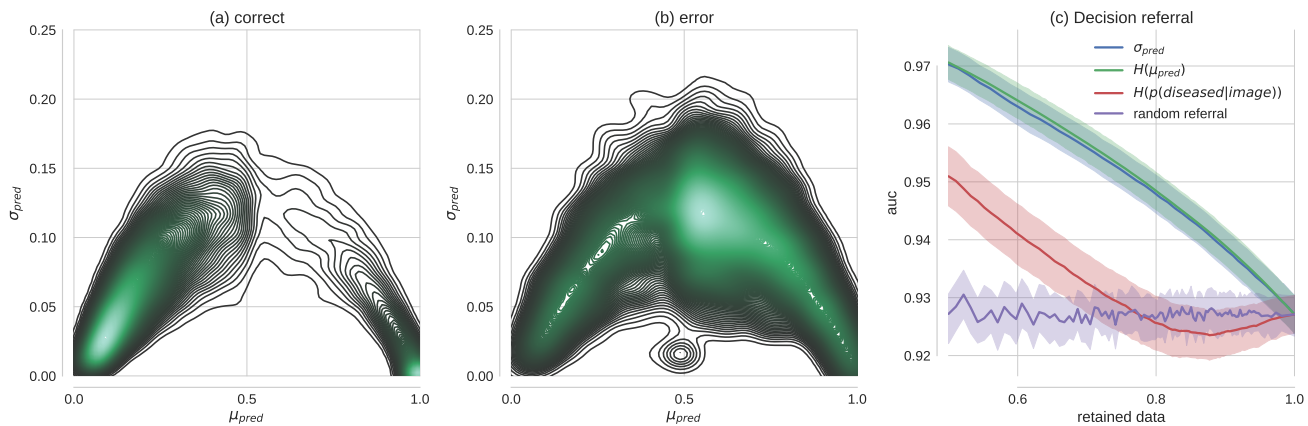

**Figure S2. (a) & (b) Relation between first ( $\mu_{pred}$ ) and second ( $\sigma_{pred}$ ) moments of approximate predictive posterior for correct (a) and erroneous (b) detection of moderate DR on Kaggle test images.  $\mu_{pred}$  obtained via MC dropout is more related with  $\sigma_{pred}$  than the network output  $p(diseased|image)$  obtained with standard dropout (compare fig. 2). (c) For comparison with our performance results obtained with  $\sigma_{pred}$  as uncertainty (fig. 4, S1), we quantified the uncertainty in terms of the binary entropy  $H(p) = -(p \log p + (1 - p) \log (1 - p))$  as an alternative uncertainty measure which is applicable to both the Bayesian and conventional network output. When using  $H(\mu_{pred})$  (green curve) we were able to achieve similar performance improvements under decision referral compared to when using  $\sigma_{pred}$  (blue curve) instead. In case of using the uncertainty derived from network outputs with dropout turned off at test time ( $H(p(diseased|image))$ ), red curve), the performance improvement under decision referral deteriorates. Random referral is shown in purple. Because we need to compute either the mean or the standard deviation of the (approximated) predictive posterior, we conclude that we do need Bayesian methods to achieve our results.**
